# Supplementary material for: Commodity production in Brazil: Combining zero deforestation and zero illegality
Source: Oxford University Press journal article supplement (doi:10.12952/journal.elementa.000076), 2015-01-01
Supplement: elementa_000076_s005.docx [file elementa_000076_s005.docx]

# **Table S1. Reductions in total area analyzed after cleanup operations within the same dataset to remove overlaps between polygons, as referenced in the ‘Methodology’ section and ‘Data’ subsection of the main text, also described in Supplemental texts S1 and S2**

| Dataset | Area deleted (ha) | % reduction of original area |
| --- | --- | --- |
| CAR | 865,766 | 2.8% |
| LAU | 315,229 | 2.3% |
| INCRA | no overlaps | no overlaps |
| TL | no overlaps | no overlaps |
