# Supplementary material for: Commodity production in Brazil: Combining zero deforestation and zero illegality
Source: Oxford University Press journal article supplement (doi:10.12952/journal.elementa.000076), 2015-01-01
Supplement: elementa_000076_s006.docx [file elementa_000076_s006.docx]

# **Table S2. Reductions in total area after removing overlaps between different property boundary datasetsa which were merged to compose an aggregate land boundary dataset as referenced in the ‘Methodology’ section and ‘Data’ subsection of the main text**

| Dataset | Area deleted (ha) | % reduction of original area |
| --- | --- | --- |
| CAR | no area | no area |
| LAU | 7,768,221 | 58% |
| INCRA | 17,458,414 | 62% |
| Terra Legal | no area | no area |

a - following the hierarchy: 1) CAR-MT, 2) LAU, 3) INCRA, 4) Terra Legal
