# Supplementary material for: Commodity production in Brazil: Combining zero deforestation and zero illegality
Source: Oxford University Press journal article supplement (doi:10.12952/journal.elementa.000076), 2015-01-01
Supplement: elementa_000076_s007.docx [file elementa_000076_s007.docx]

# **Table S3. Overall area description of sample properties as referenced in the ‘Results’ section and ‘Sample description’ subsection of the main text, and Supplemental text S4**

|  |  | Total | Excluding Pantanal |
| --- | --- | --- | --- |
|  | **2010 Soy area (ha) in MT (Aprosoja - non-spatial)** | 6,411,940 | 6,411,940 |
|  | **2010 Soy area (ha) in MT (Macedo et al., 2012)** | 6,380,834 | 6,344,753 |
|  | **2010 Soy area (ha) by Macedo et al. (2012) overlapped with identified properties** | 4,717,444 | 4,693,954 |
|  | **# of identified properties (CAR-LAU-INCRA-TL)** | 48,909 | 47,382 |
| A=B+C | **Total area (ha) of identified properties** | 45,605,704 | 42,078,566 |
| B | **Non-forest areas (ha)** | 11,849,148 | 8,728,306 |
| C=D+E | **Total area (ha) of original native vegetation in identified properties** | 33,756,556 | 33,350,260 |
| D | **Total deforestation (ha) in identified properties (Amazon, Cerrado and Pantanal biomes)** | 19,367,339 | 19,220,470 |
| E | **Total remaining native vegetation (ha) in identified properties (Amazon, Cerrado and Pantanal biomes)** | 14,389,217 | 14,129,790 |
