# Supplementary material for: Commodity production in Brazil: Combining zero deforestation and zero illegality
Source: Oxford University Press journal article supplement (doi:10.12952/journal.elementa.000076), 2015-01-01
Supplement: elementa_000076_s009.docx [file elementa_000076_s009.docx]

# **Table S5: Classification and description of soy properties according to compliance with legal reserve (LR) requirements (Amazon and Cerrado biomes aggregated) as referenced in the ‘Results’ section and ‘Level of non-compliance with legal reserve requirements in properties with soy in Mato Grosso’ subsection of the main text**

| Status  (Amazon and Cerrado) | Properties with LR surplus | Properties with LR deficit granted amnesty | Properties with LR deficit | Total |
| --- | --- | --- | --- | --- |
| # of properties | 722 | 2,017 | 6,374 | 9,113 |
| % of # of properties in sample | 7.9% | 22.1% | 69.9% | 100% |
| Total area (ha) of properties | 2,228,846 | 426,405 | 15,479,675 | 18,134,926 |
| % of area of properties in sample | 12.3% | 2.3% | 85.4% | 100% |
| Soy area (ha) in properties | 258,603 | 254,259 | 4,085,168 | 4,598,030 |
| % of soy area of properties in sample | 5.6% | 5.5% | 88.9% | 100% |
| Area of LR surplus (ha) | 270,004 | - | - | 270,004 |
| Area of LR deficit (ha) | - | - | 4,294,203 | 4,294,203 |
| Area of LR deficit granted amnesty (ha) | - | 157,107 | - | 157,107 |
