# Supplementary material for: Commodity production in Brazil: Combining zero deforestation and zero illegality
Source: Oxford University Press journal article supplement (doi:10.12952/journal.elementa.000076), 2015-01-01
Supplement: elementa_000076_s011.docx [file elementa_000076_s011.docx]

# **Table S7: Same as Tables S5, but disaggregated at the biome level, showing the classification and description of soy properties according to compliance with legal reserve (LR) requirements (only Cerrado biome of Mato Grosso disaggregated) as referenced in the ‘Results’ section and ‘Level of non-compliance with legal reserve requirements in properties with soy in Mato Grosso’ subsection of the main text**

| Status  (Cerrado) | Properties with LR surplus | Properties with LR deficit granted amnesty | Properties with LR deficit | Total |
| --- | --- | --- | --- | --- |
| # of properties | 490 | 1,262 | 4,07 | 5,822 |
| % of # of properties in sample | 8.4% | 21.7% | 69.9% | 100% |
| Total area (ha) of properties | 1,328,081 | 231,219 | 7,835,550 | 9,394,850 |
| % of area of properties in sample | 14.1% | 2.5% | 83.4% | 100% |
| Soy area (ha) in properties | 186,576 | 168,042 | 2,945,783 | 3,300,401 |
| % of soy area of properties in sample | 5.6% | 5.1% | 89.3% | 100% |
| Area of LR surplus (ha) | 217,775 | - | - | 217,775 |
| Area of LR deficit (ha) | - | - | 1,538,213 | 1,538,213 |
| Area of LR deficit granted amnesty (ha) | - | 61,687 | - | 61,687 |
