# Supplementary material for: Commodity production in Brazil: Combining zero deforestation and zero illegality
Source: Oxford University Press journal article supplement (doi:10.12952/journal.elementa.000076), 2015-01-01
Supplement: elementa_000076_s012.docx [file elementa_000076_s012.docx]

# **Table S8: Properties with soy in the Amazon and the level of compliance with zero deforestation (soy moratorium) and the Forest Code as referenced in the ‘Results’ section and ‘Soy Moratorium: effectiveness for zero deforestation but not for compliance with forest legislation’ subsection of the main text**

| Status  (Soy properties in the Amazon biome of Mato Grosso) | *# of prop.* | *% of sub sample (#)* | *Total area (ha) of properties* | *% of subsample (area)* |
| --- | --- | --- | --- | --- |
| Total subsample | 3,291 | 100 | 8,740,075 | 100% |
| A - No deforestation after July 2008 | 2,686 | 81.62% | 5,373,746 | 61,48% |
| B – No deforestation after July 2008 and non-compliant with the FC | 1,738 | 64.7% of A | 4,538,385 | 84.5% of A |
| C – No deforestation after July 2008 and compliant with FC | 948 | 35.3% of A | 835,361 | 15.5% of A |
