# Supplementary material for: Commodity production in Brazil: Combining zero deforestation and zero illegality
Source: Oxford University Press journal article supplement (doi:10.12952/journal.elementa.000076), 2015-01-01
Supplement: elementa_000076_s013.docx [file elementa_000076_s013.docx]

# **Table S9: Properties with soy in the Amazon and level of compliance with the soy moratorium and the Forest Code (same as Table S8), including areas of legal reserve surpluses and deficits as referenced in the ‘Results’ section and ‘Soy Moratorium: effectiveness for zero deforestation but not for compliance with forest legislation’ subsection of the main text**

| Status  *(*Soy properties in the Amazon biome of Mato Grosso*)* | # of prop. | Total area (ha) of properties | Area of surplus (LR excess) (ha) | Area of liability (LR deficit) (ha) |
| --- | --- | --- | --- | --- |
| Total sample | 3,291 | 8,740,075 | 52,229 | 2,755,990 |
| A - No deforestation after July 2008 | 2,686 | 5,373,746 | 38,225 | 1,747,745 |
| B – No deforestation after July 2008 and non-compliant with the FC | 1,738 | 4,538,385 | 0 | 1,747,745 |
| C – No deforestation after July 2008 and compliant with the FC | 948 | 835,361 | 38,225 | 0 |
