# Supplementary material for: Commodity production in Brazil: Combining zero deforestation and zero illegality
Source: Oxford University Press journal article supplement (doi:10.12952/journal.elementa.000076), 2015-01-01
Supplement: elementa_000076_s014.docx [file elementa_000076_s014.docx]

# Figure S1: Summary of data processing and operations.

This figure summarizes all processing and analytical operations conducted in order to obtain a final dataset with all needed information as described in the ‘Methodology’ section and ‘Data processing’ subsection of the main text.
