# Supplementary material for: Commodity production in Brazil: Combining zero deforestation and zero illegality
Source: Oxford University Press journal article supplement (doi:10.12952/journal.elementa.000076), 2015-01-01
Supplement: elementa_000076_s015.docx [file elementa_000076_s015.docx]

# Figure S2: Framework to classify properties according to compliance with legal reserve (LR) requirements.

This figure is a flowchart detailing how properties were classified as compliant or noncompliant according to Forest Code legal reserve regulations, considering the amnesty granted to small holders (up to four fiscal modules) by the current Forest Code version (2012).
